# Supplementary figures and images for: Patient Work and Treatment Burden in Type 2 Diabetes: A Mixed-Methods Study
Source: PubMed Central journal article supplement — Mayo Clin Proc Innov Qual Outcomes. 2021 Apr 8;5(2):359–67. doi: 10.1016/j.mayocpiqo.2021.01.006 (PMC8105508; doi:10.1016/j.mayocpiqo.2021.01.006), 2021-04-08

Photograph 1. Storing diabetes supplies at home

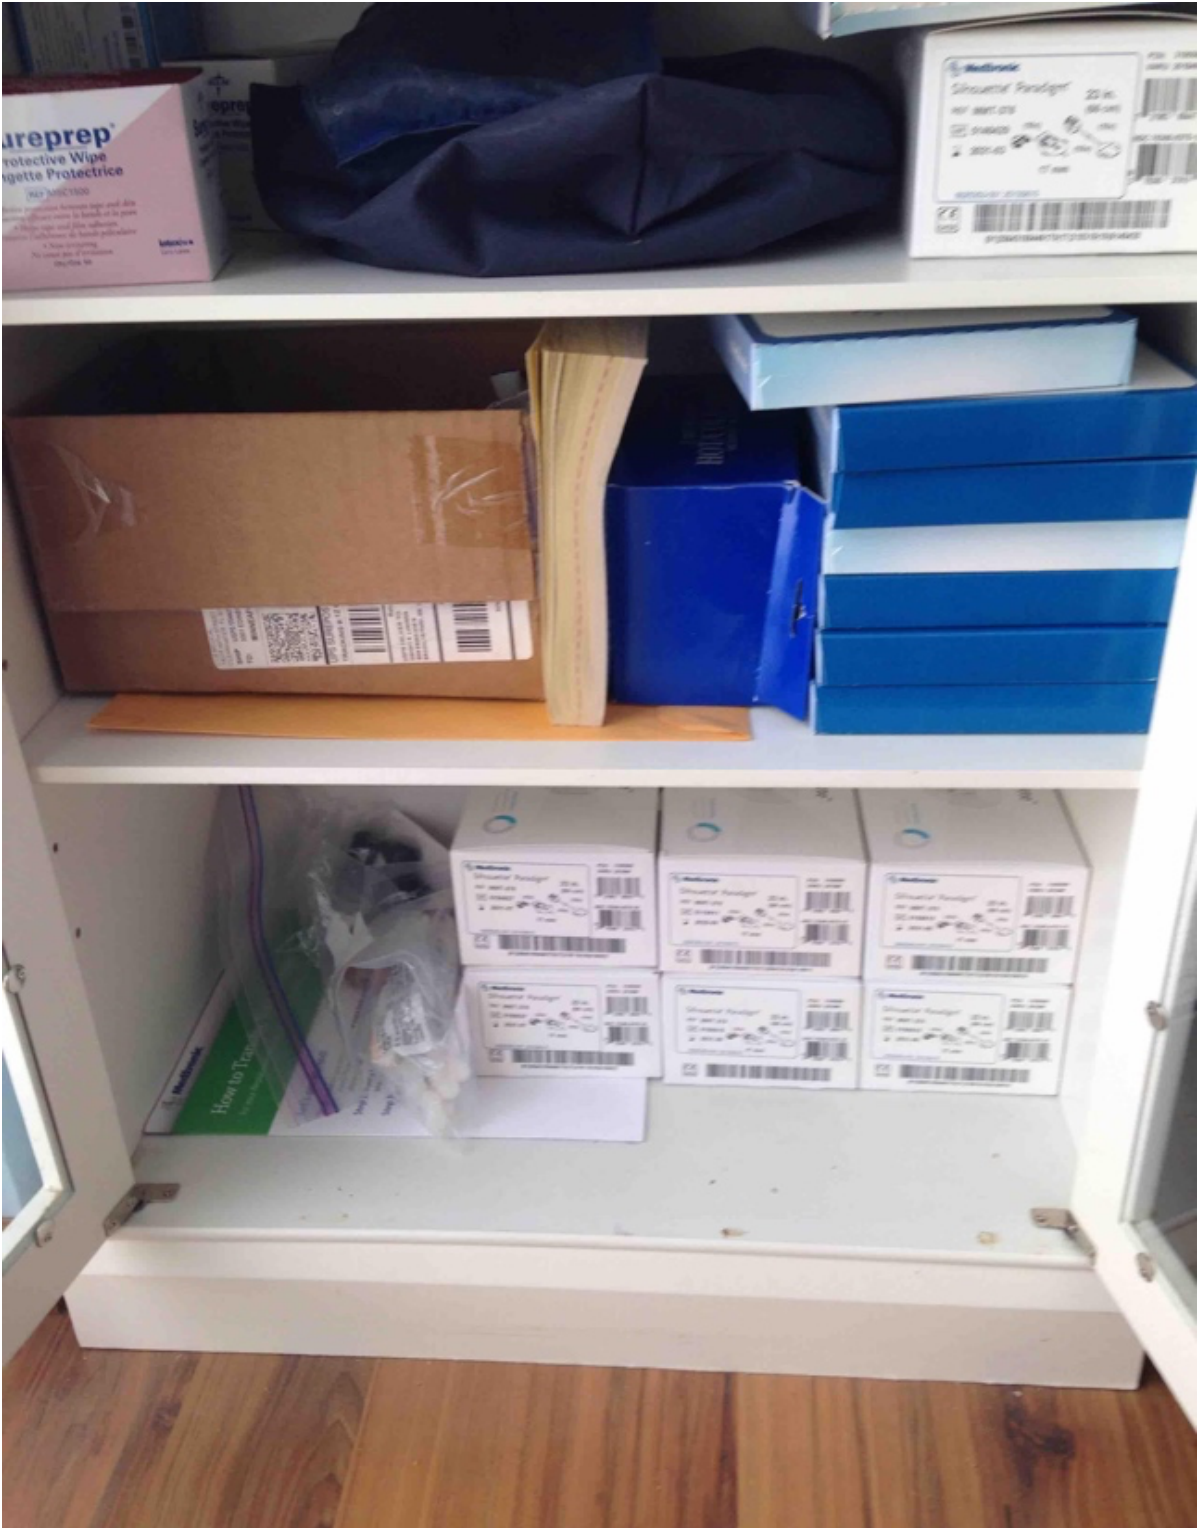

Supplement: mmc2.pdf [file mmc2.pdf]

Photograph 2. An overwhelming treatment box

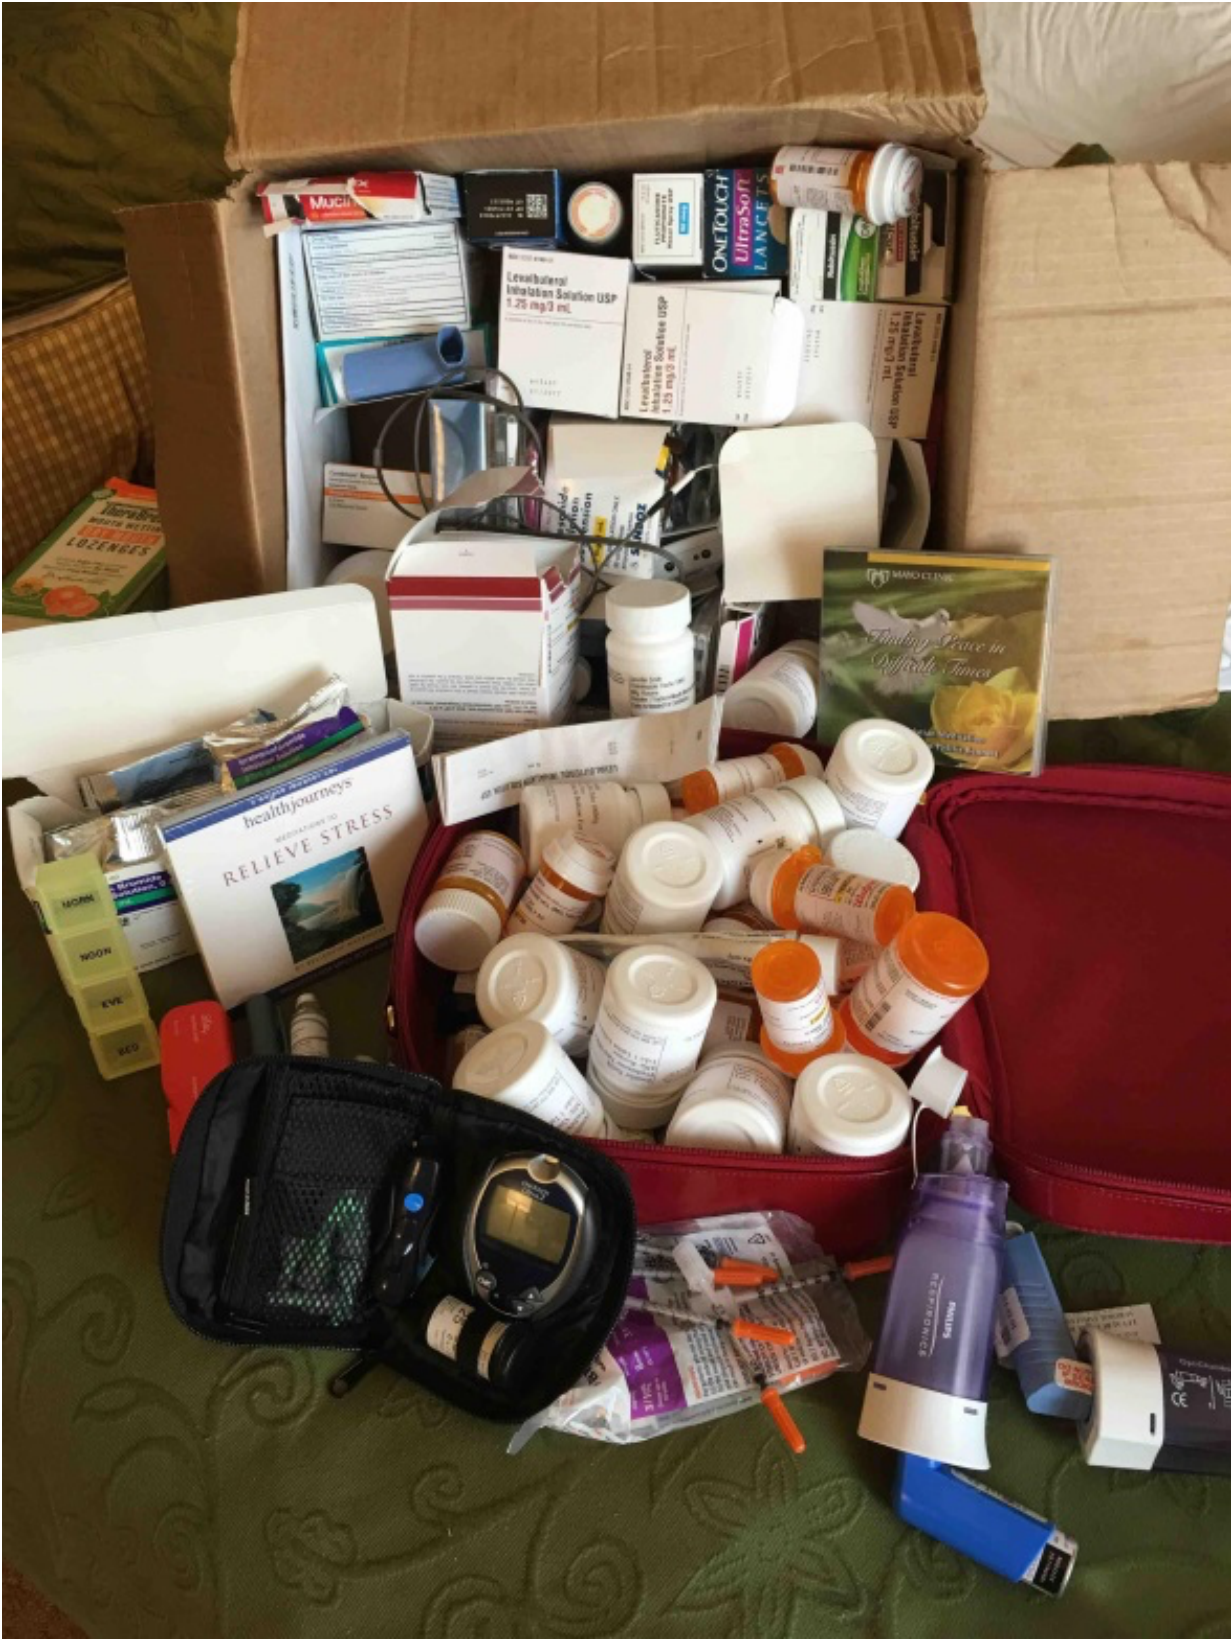

Supplement: mmc3.pdf [file mmc3.pdf]

**Panel. Activities and meaningful hobbies are not burdensome**

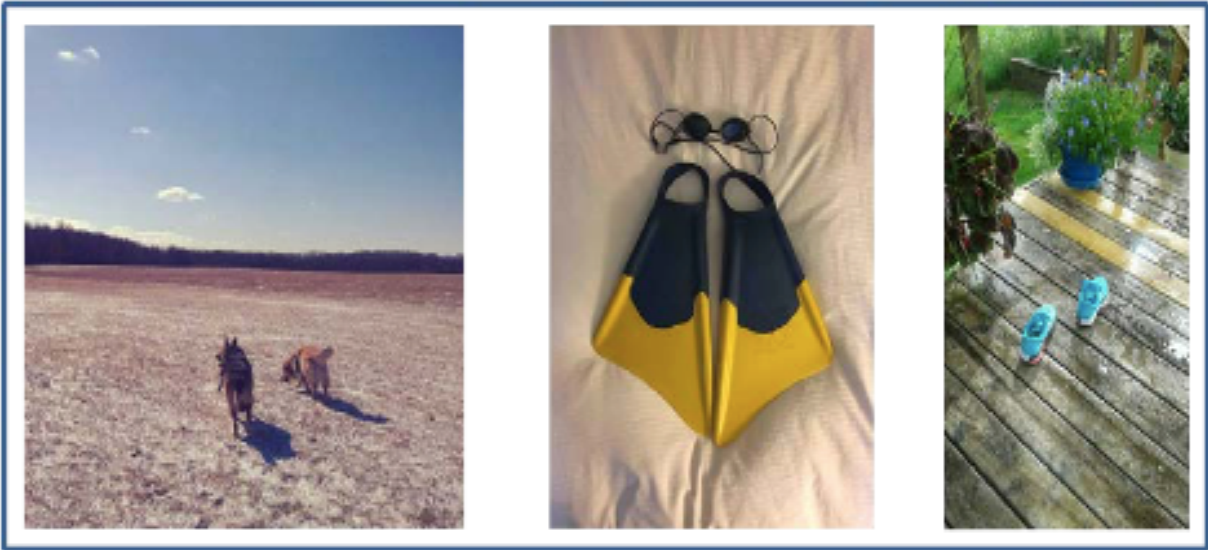

Supplement: mmc4.pdf [file mmc4.pdf]
